# Supplementary material for: Highly Efficient Transfer Hydrogenation of Biomass-Derived Furfural to Furfuryl Alcohol over Mesoporous Zr-Containing Hybrids with 5-Sulfosalicylic Acid as a Ligand
Source: MDPI journal article supplement (doi:10.3390/ijerph19159221), 2022-07-28
Supplement: s1 [file s1]

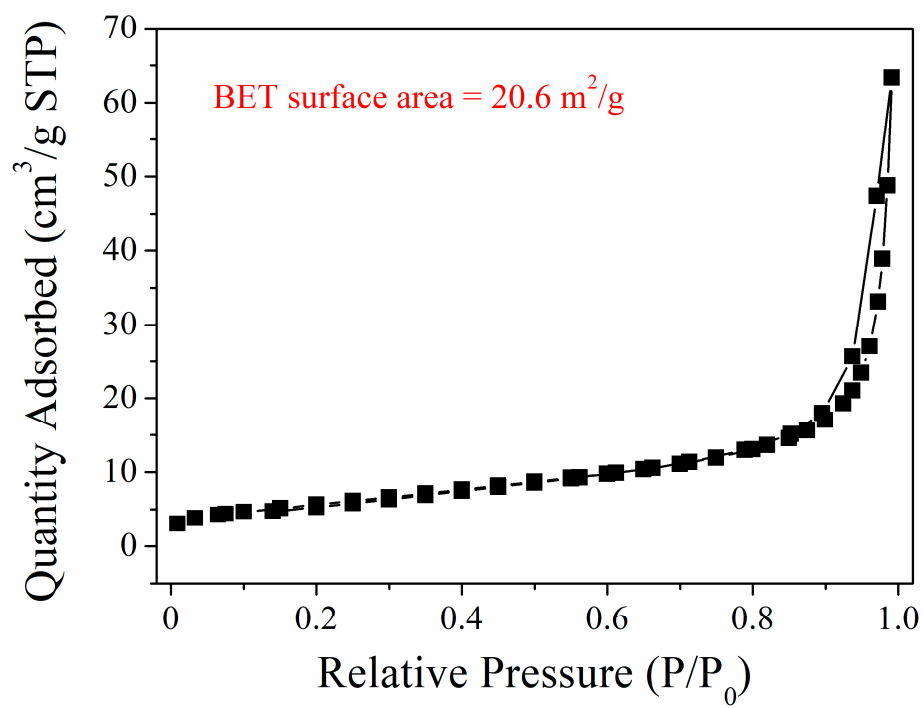

**Figure S1.** Nitrogen adsorption-desorption isotherm of nano-ZrO<sub>2</sub>.

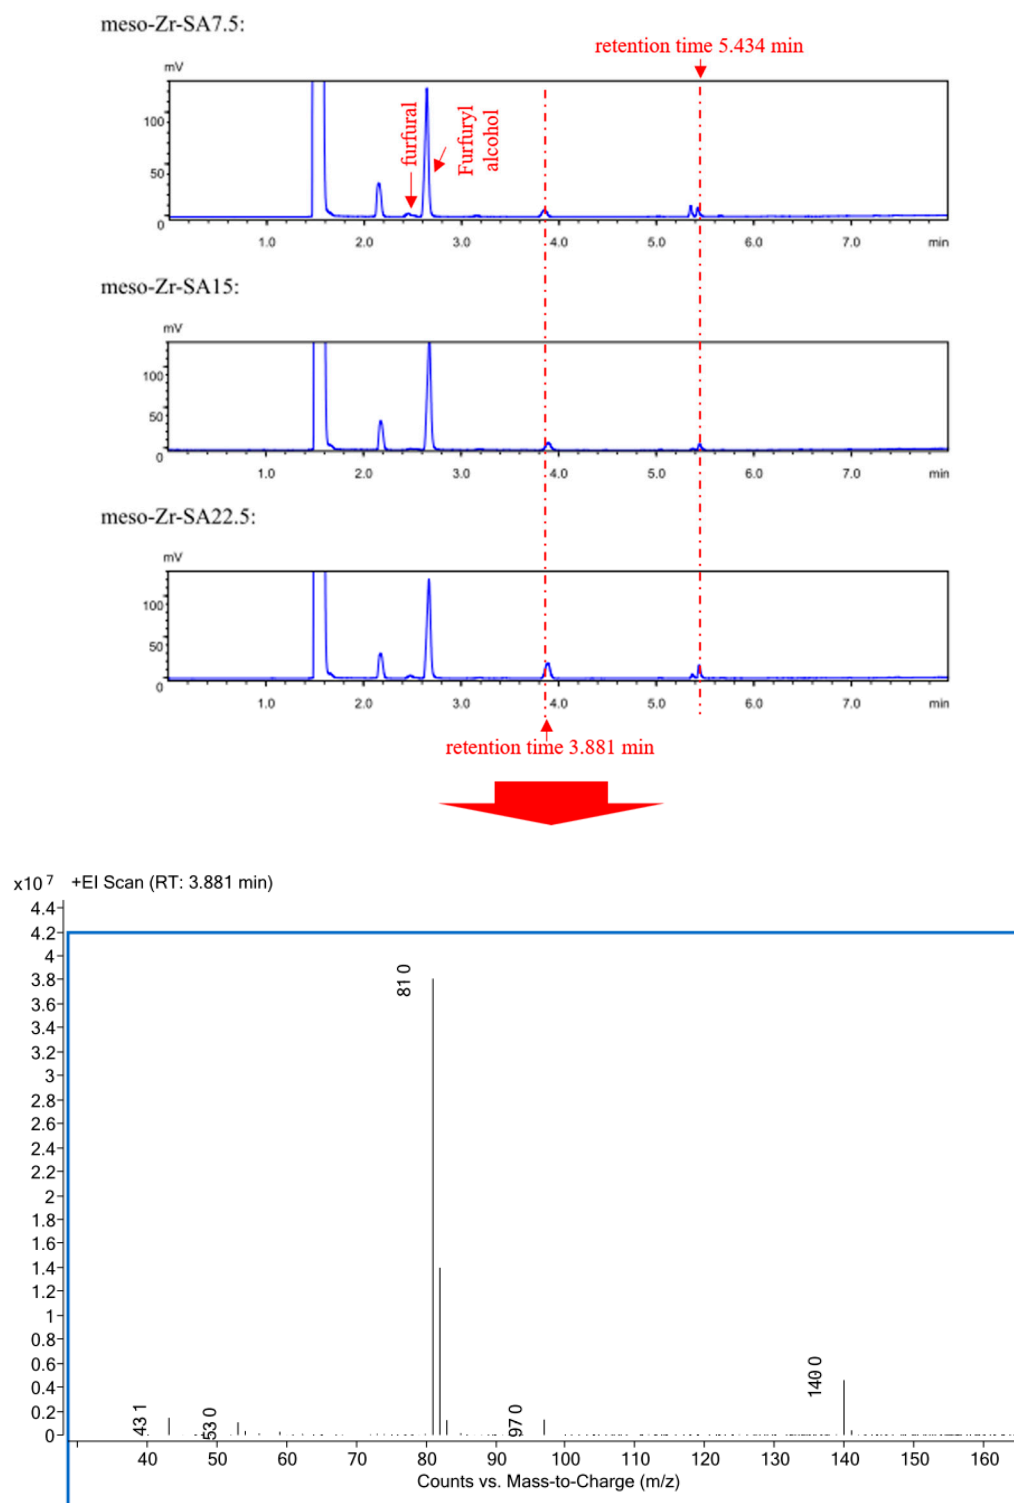

**Figure S2.** Gas chromatograms of samples obtained after reaction for 4 h over mesoporous Zr-hybrids along with the mass spectra of byproduct at retention time of 3.881 min. Reaction conditions: 1 mmol furfural, 100 mg catalyst, 110 °C.

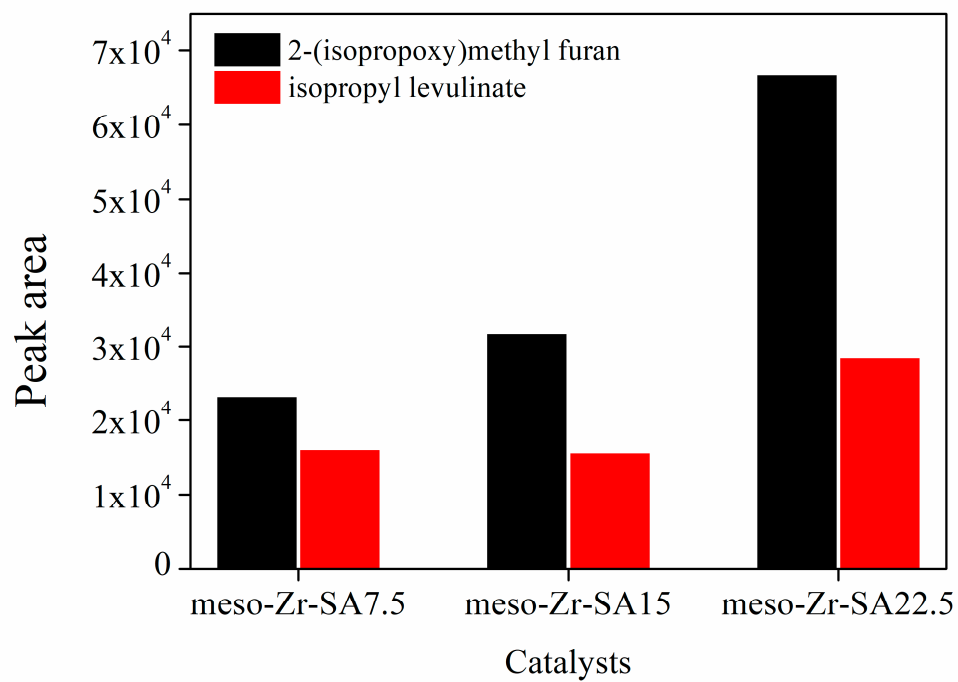

**Figure S3.** The peak area of each byproduct after reaction for 4 h over mesoporous Zr-hybrids.

**Table S1.** The contents of acid sites in nano-ZrO<sub>2</sub> basing on pyridine-adsorbed FTIR spectra at desorption temperature of 150 °C.

| Sample                | BA <sup>a</sup> content<br>(μmol/g) | LA <sup>b</sup> content<br>(μmol/g) | BA+LA (μmol/g) |
|-----------------------|-------------------------------------|-------------------------------------|----------------|
| nano-ZrO <sub>2</sub> | 7.0                                 | 71.3                                | 78.3           |

<sup>a</sup> BA stands for Brønsted acid; <sup>b</sup> LA stands for Lewis acid

**Table S2.** MPV reduction of furfural to furfuryl alcohol over meso-Zr-SA15 at 130 and 150 °C

| Temperature<br>(°C) | Time<br>(h) | Furfural<br>conversion (%) | Furfuryl alcohol<br>yield (%) | Furfuryl alcohol<br>selectivity (%) |
|---------------------|-------------|----------------------------|-------------------------------|-------------------------------------|
| 130                 | 1           | 91.4                       | 85.2                          | 93.2                                |
| 130                 | 2           | 97.9                       | 93.3                          | 95.3                                |
| 130                 | 3           | 99.3                       | 92.6                          | 93.2                                |
| 150                 | 1           | 98.5                       | 92.5                          | 93.9                                |
| 150                 | 2           | 99.8                       | 76.4                          | 76.6                                |

**Table S3.** Reusability of meso-Zr-SA15 in MPV reduction of furfural to furfuryl alcohol performed at reaction time of 2 h.

| Run | Furfural conversion (%) | Furfuryl alcohol<br>yield (%) | Furfuryl alcohol<br>selectivity (%) |
|-----|-------------------------|-------------------------------|-------------------------------------|
| 1   | 92.1                    | 88.2                          | 95.8                                |
| 2   | 92.8                    | 88.3                          | 95.1                                |
| 3   | 91.9                    | 87.6                          | 95.3                                |
| 4   | 91.7                    | 87.5                          | 95.4                                |
| 5   | 91.1                    | 86.9                          | 95.3                                |
